# Supplementary material
Source: PubMed Central journal article supplement (PMC6279371)
Supplement: djx243_supp.pdf [file djx243_supp.pdf]

## SUPPLEMENTARY MATERIALS

### Prognostic power of a tumor differentiation gene signature for bladder urothelial carcinomas

<sup>1,2</sup> Qianxing Mo, <sup>3</sup> Fotis Nikolos, <sup>2</sup> Fengju Chen, <sup>3</sup> Zoe Tramel, <sup>3</sup> Yu-Cheng Lee, <sup>3</sup> Kazukuni Hayashi,  
<sup>3</sup> Jing Xiao, <sup>4</sup> Jianjun Shen, and <sup>2,3,5,6,7</sup> Keith Syson Chan

<sup>1</sup>Department of Medicine,

<sup>2</sup>Dan L Duncan Comprehensive Cancer Center,

<sup>3</sup>Department of Molecular & Cellular Biology,

<sup>4</sup>University of Texas, M.D. Anderson Cancer Center, 1515 Holcombe Blvd, Houston, Texas 77030

<sup>5</sup>Center for Cell, Gene and Therapy,

<sup>6</sup>Center for Drug Discovery, and

<sup>7</sup>Scott Department of Urology,

Baylor College of Medicine, One Baylor Plaza, Houston, Texas, 77030

\* To whom correspondence should be addressed

Qianxing Mo: [qmo@bcm.edu](mailto:qmo@bcm.edu); [713-798-2599](tel:713-798-2599)

Keith Syson Chan: [kc1@bcm.edu](mailto:kc1@bcm.edu); [713-798-5485](tel:713-798-5485)

# Supplementary Figure 1

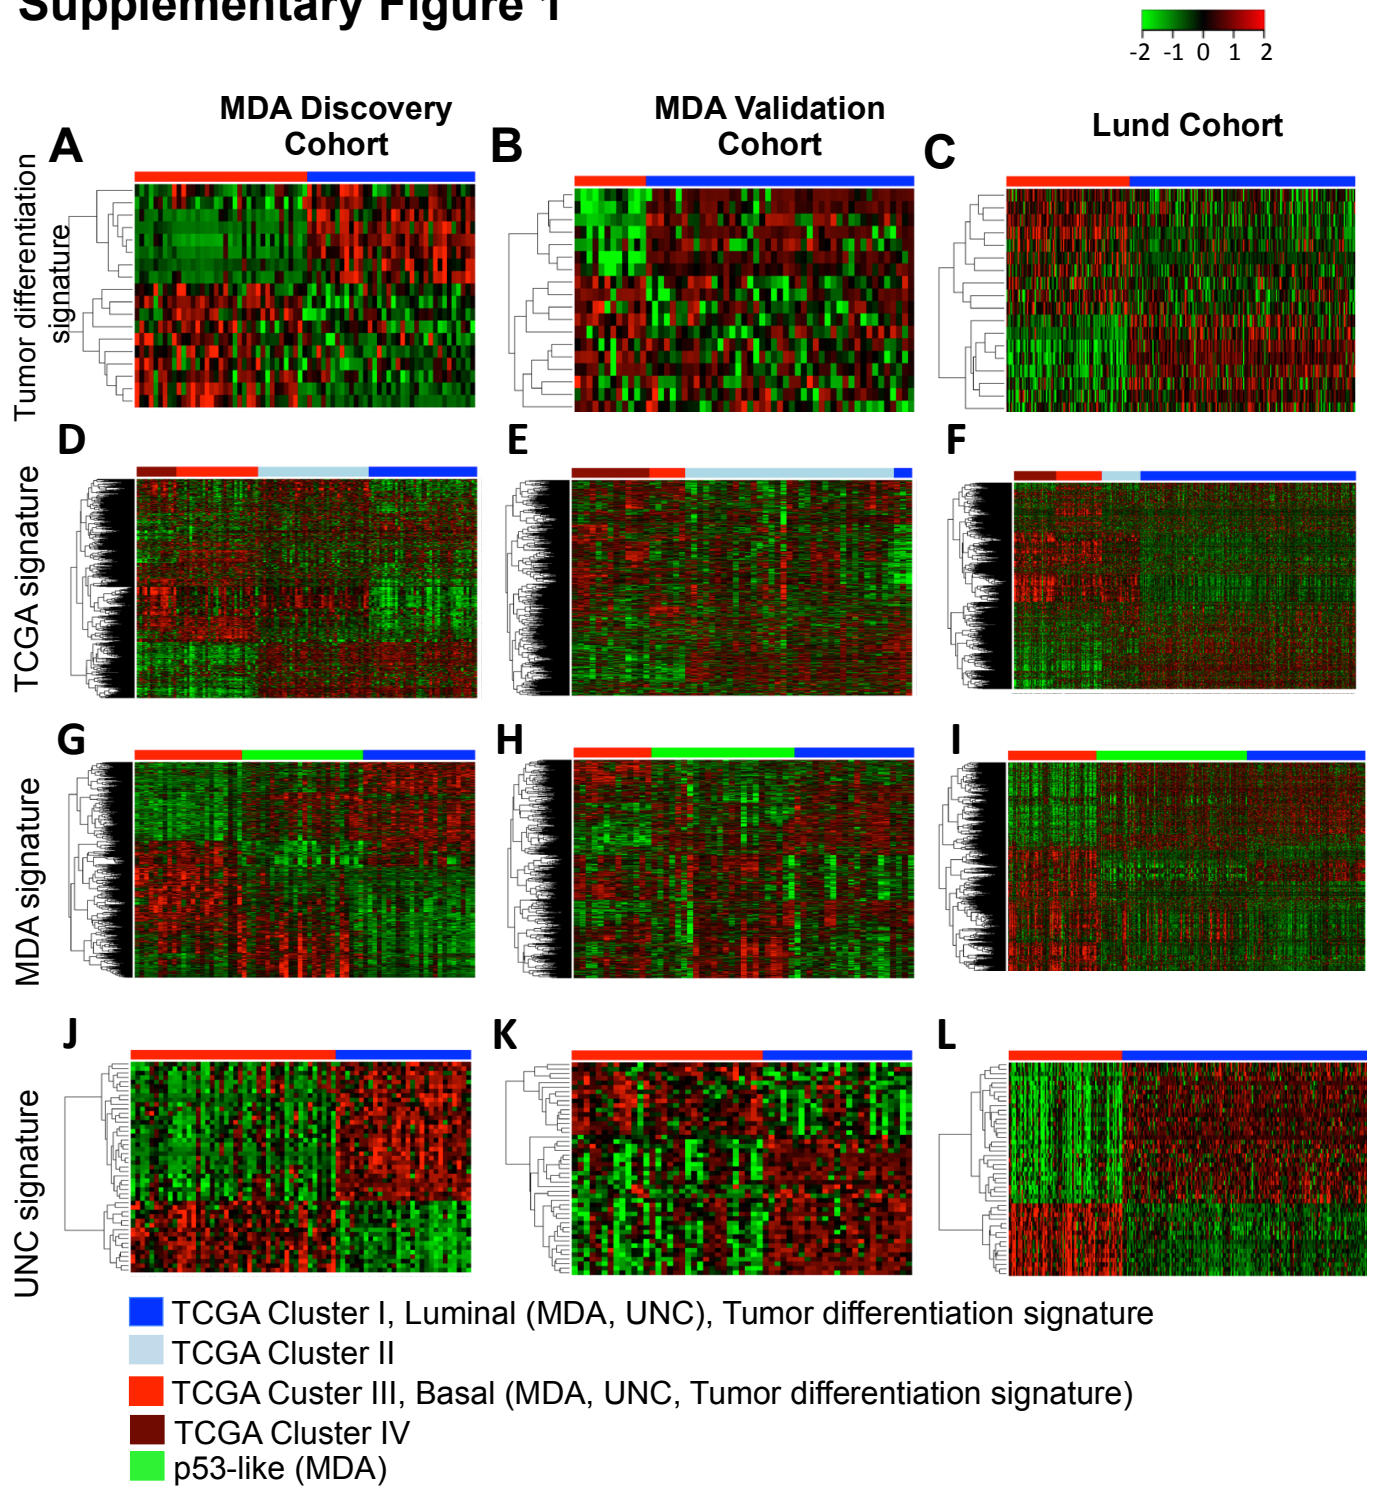

**Supplementary Figure 1. Classification of MIBCs into various subtypes by four different gene signatures.** Classification of MDA discovery and MDA validation cohorts of MIBC patients using the 1-nearest neighbor algorithm and the tumor differentiation (**A-B**), TCGA (**D-E**), MDA (**G-H**) and UNC (**J-K**) signatures respectively. The tumor differentiation signature stratifies MIBC patients into basal (red) and differentiated (blue) subtypes. The TCGA signature classifies MIBC patients into four clusters: I, II, III and IV as indicated by colorimetric legends. The MDA signature classifies MIBC patients into three subtypes: basal (red), p53-like (green), and luminal (blue). The UNC signature classifies MIBC patients into basal (red) and luminal (blue) subtypes. **(C,F,I,L)** Classification of Lund cohort of patients, which comprises of both muscle-invasive and non-muscle invasive bladder cancers using the same methodology as in MIBC pure cohorts. Although non-invasive and muscle-invasive bladder cancers were reported to develop through independent pathogenesis with certain overlap, the signatures were able to stratify them into similar subtypes as those in MIBC pure cohorts.

# Supplementary Figure 2

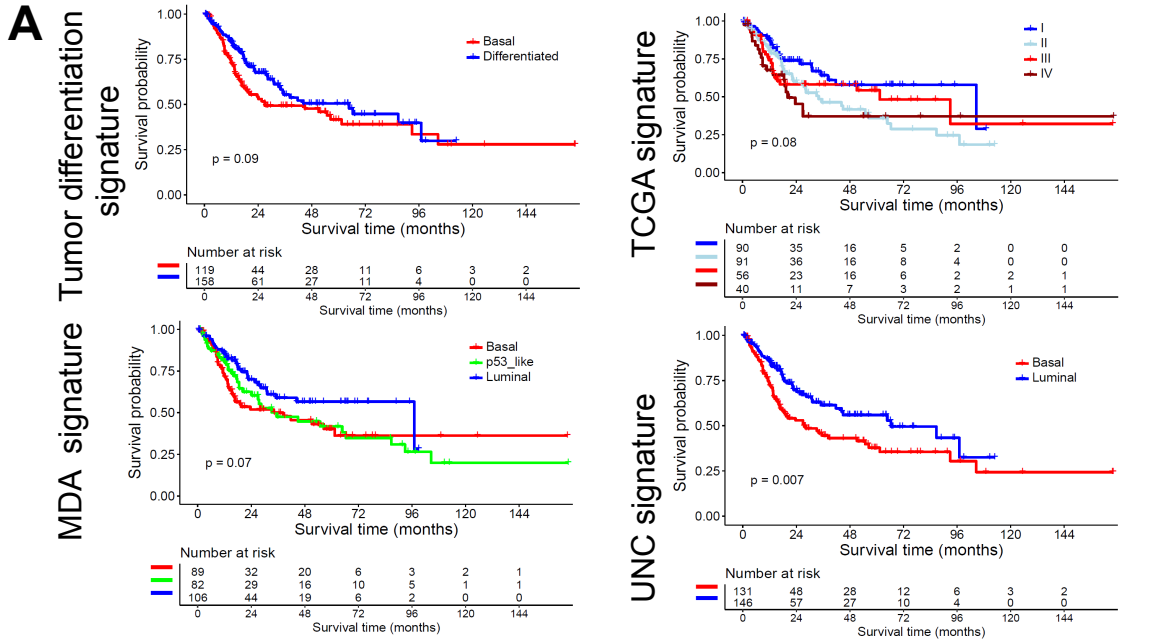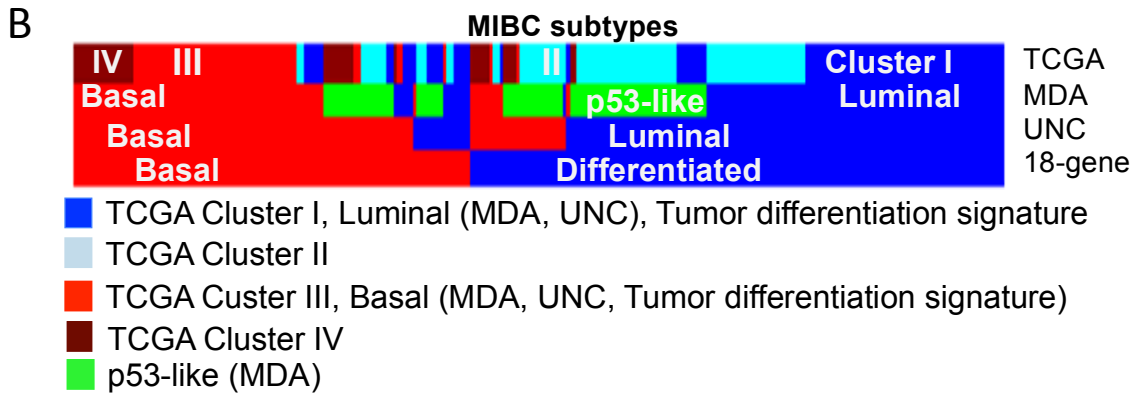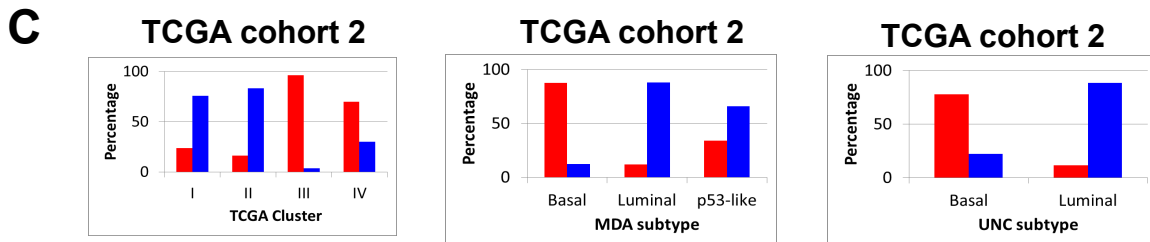

**Subtypes based on the tumor differentiation gene signature**

— Basal

— Differentiated

**Supplementary Figure 2. Analysis of the unpublished TCGA cohort by four different molecular signatures. (A)** Application of the tumor differentiation signature in the unpublished TCGA cohort (n=279) in direct comparison with the TCGA/MDA/UNC signatures in stratifying overall survival of MIBC patients. **(B)** Colorimetric chart demonstrating the distribution of unpublished TCGA cohort patients assigned by TCGA/MDA/UNC and the tumor differentiation signatures and their relation to other signatures. **(C)** Bar graph representation demonstrating the percentage of basal and differentiated tumors assigned by the tumor differentiation signature, in direct comparison to subtype assignments by the TCGA/MDA/UNC signatures in the unpublished TCGA cohort of patients. The P values (Log-rank test) are two-sided.

## Supplementary Figure 3

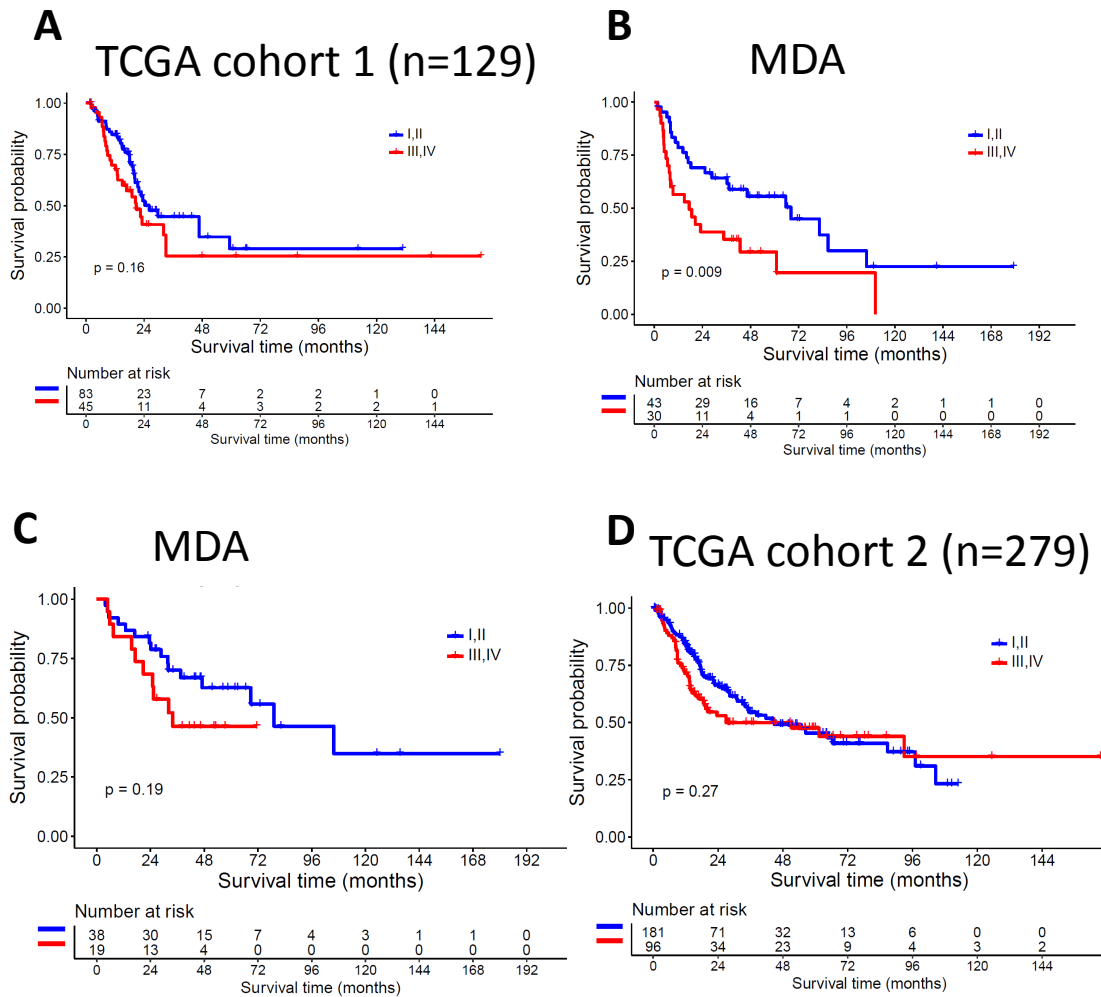

### Supplementary Figure 3. Analysis of MIBC cohorts by combining TCGA molecular clusters.

Analysis of the overall survival probability in the published TCGA cohort 1 (n=129) (A), unpublished TCGA cohort 2 (n=279) (B), MDA Discovery (C), and MDA Validation (D) MIBC cohorts by combining TCGA cluster I+II and cluster III+IV. The P values (Log-rank test) are two-sided.

# Supplementary Figure 4

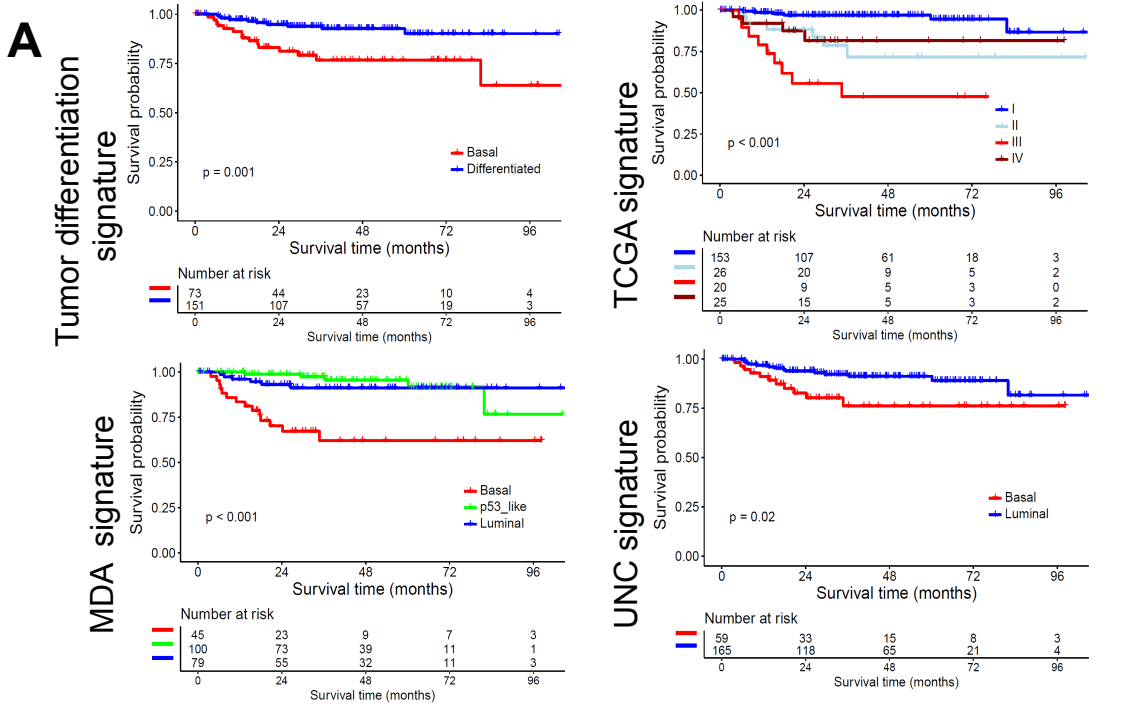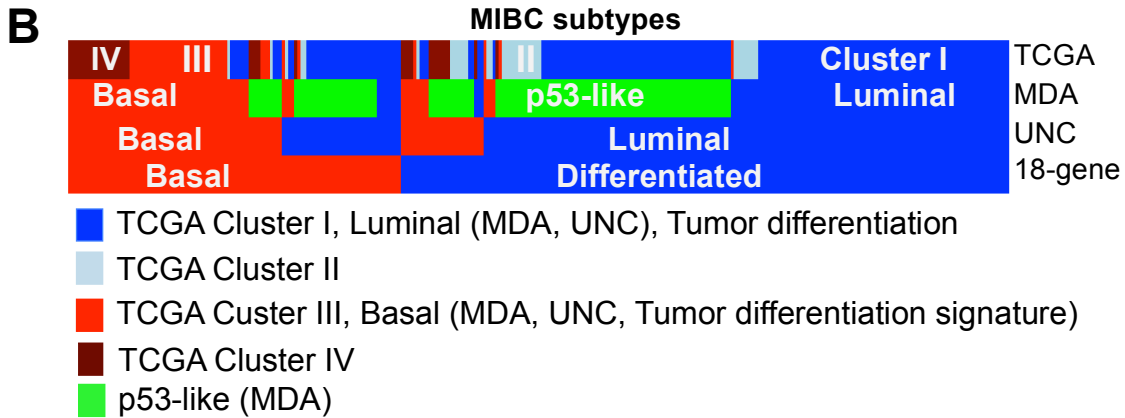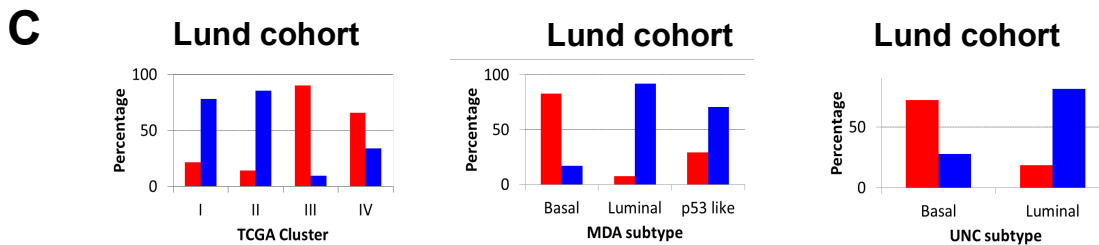

## Subtypes based on the tumor differentiation gene signature

- Basal
- Differentiated

**Supplementary Figure 4. Analysis of the Lund cohort with both muscle-invasive and non-invasive bladder cancers. (A)** Application of the tumor differentiation signature in the Lund cohorts in direct comparison with the TCGA/MDA/UNC signatures in stratifying overall survival of MIBC patients. **(B)** Colorimetric chart demonstrating the distribution of Lund cohort patients assigned by TCGA/MDA/UNC and the tumor differentiation signatures and their relation to other signatures. **(C)** The percentage of basal and differentiated tumors assigned by the tumor differentiation signature, in the subtype assignments by the TCGA/MDA/UNC signatures in the Lund cohort of patients. The P values (Log-rank test) are two-sided.



# Supplementary Figure 5

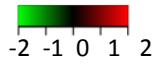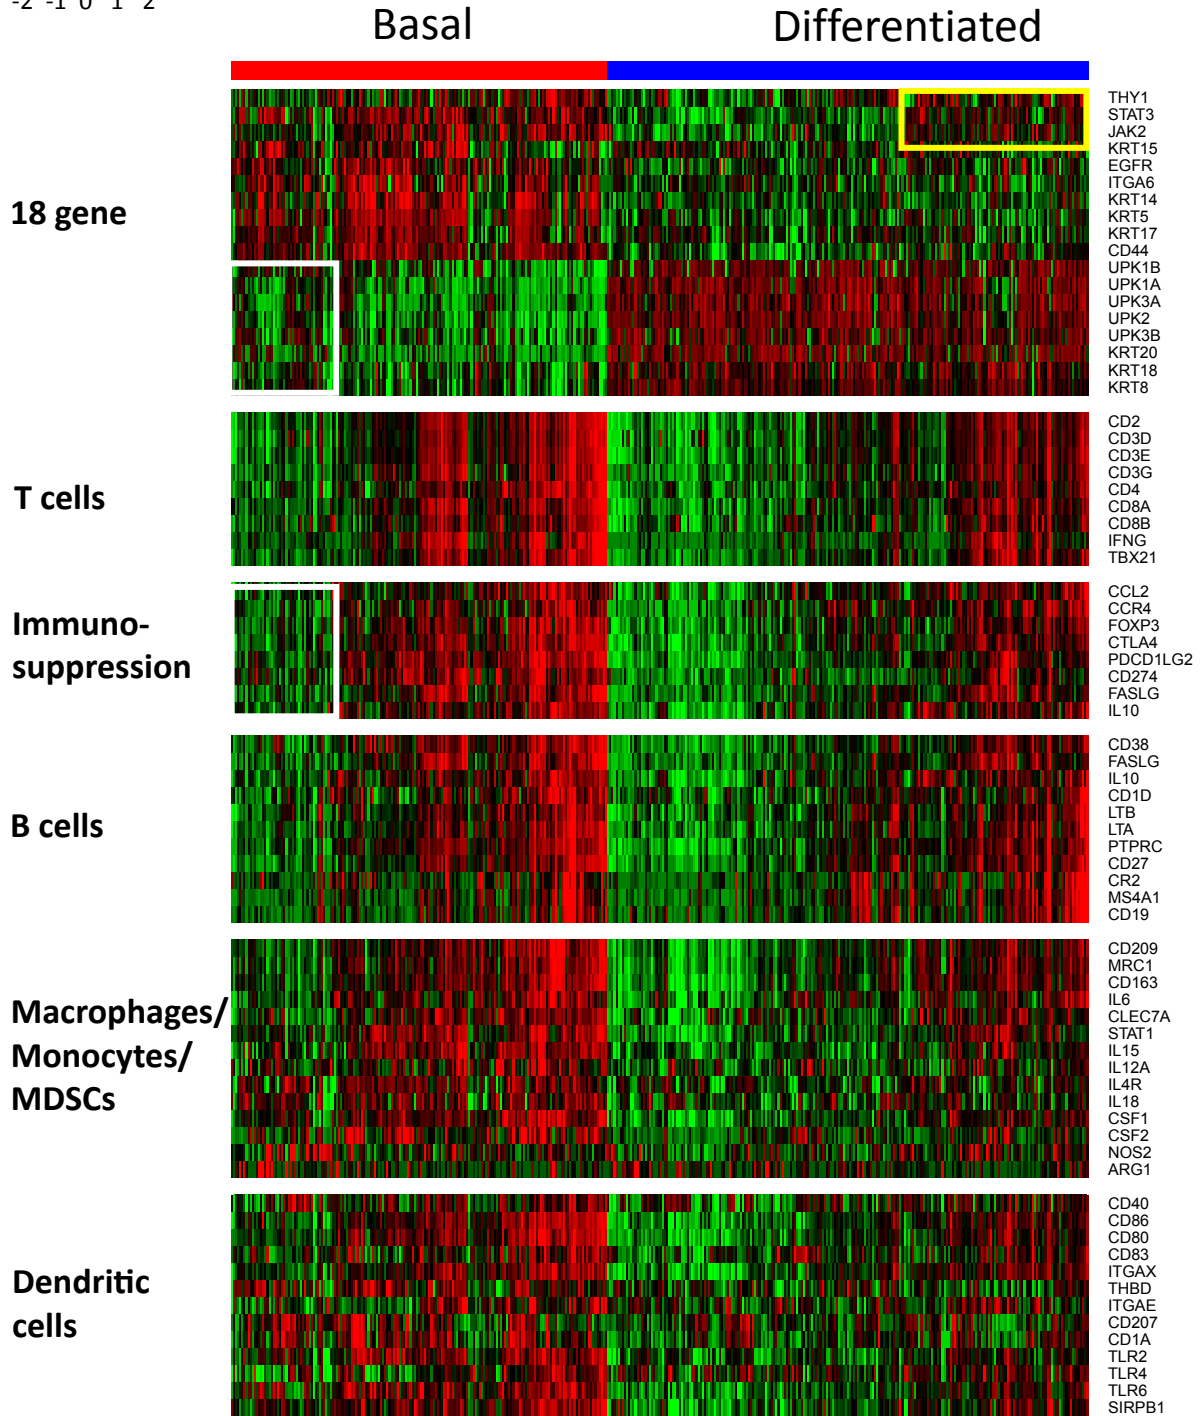

**Supplementary Figure 5.** Highlighted portions of the immune cell gene expression analysis in basal and differentiated MIBCs of the combined TCGA cohort 1 and 2. Replica of heat map from figure 6F with highlighted areas of differential expression in differentiated (yellow boxes) and basal (white boxes) subgroups.
